# Supplementary material
Source: publisher figshare collection journal article supplement (https://sage.figshare.com/ndownloader/files/15681131)
Supplement: Supplementary file 1 [file 15681131]

Appendix Table 1. Participants' job characteristics across the program

|                  | Program 1 |      | Program 2 |      | Program 3 |      | Completed<br>3 programs |      | Withdrew |      |
|------------------|-----------|------|-----------|------|-----------|------|-------------------------|------|----------|------|
|                  | n = 85    |      | n = 73    |      | n = 52    |      | n = 52                  |      | n = 33   |      |
| Job category     | n         | %    | n         | %    | n         | %    | n                       | %    | n        | %    |
| Medical doctor   | 14        | 16.5 | 11        | 15.0 | 9         | 17.3 | 9                       | 17.3 | 5        | 15.1 |
| Registered nurse | 54        | 63.5 | 47        | 64.3 | 33        | 63.4 | 33                      | 63.4 | 21       | 63.6 |
| Pharmacist       | 1         | 1.2  | 1         | 1.3  | 1         | 1.9  | 1                       | 1.9  | 0        | 0    |
| Social worker    | 8         | 9.4  | 7         | 9.5  | 4         | 7.6  | 4                       | 7.6  | 4        | 12.1 |
| Care worker      | 3         | 3.5  | 2         | 2.7  | 1         | 1.9  | 1                       | 1.9  | 2        | 6.0  |
| Other            | 5         | 5.9  | 5         | 6.8  | 4         | 7.6  | 4                       | 7.6  | 1        | 3.0  |

## Appendix Table 2. The qualitative data findings from our program evaluation

### Question 1: How did you feel after the program?

| Code                                                                                                                                                                                                                             | Category                                                                              |
|----------------------------------------------------------------------------------------------------------------------------------------------------------------------------------------------------------------------------------|---------------------------------------------------------------------------------------|
| -Need to think more about my own EOL care<br>-Difficulty thinking about my own death<br>-Recognise the differences between thinking as a medical professional and thinking as a patient                                          | <b>Understanding the values of my own EOL</b>                                         |
| -Understanding the necessity of being able to communicate about EOL care<br>-Difficulty building relationships with patient families                                                                                             | <b>Awareness of the necessary to communicate about EOL care</b>                       |
| -Awareness of the existence of diverse values<br>-The importance of exchanging diverse values                                                                                                                                    | <b>Understanding the importance of exchanging opinions in multidisciplinary teams</b> |
| -Difficulty finding a time to start ACP<br>-Timing difficulties concerning thinking about EOL                                                                                                                                    | <b>Uncertainty regarding the timing of ACP implementation</b>                         |
| -Importance of establishing a relationship of trust with patients' families<br>-It is vital to do implement ACP from an early stage<br>-The importance of listening to and confirming the stories of patients and their families | <b>Found tips for effective ACP implementation</b>                                    |

### Question 2: How can you more effectively implement EOL care from now on?

| Code                                                                                                                                                                                                     | Category                                         |
|----------------------------------------------------------------------------------------------------------------------------------------------------------------------------------------------------------|--------------------------------------------------|
| -Create opportunities for patients and patients' family to talk<br>-Show interest in patients' life history<br>-Discuss EOL care from preliminary stages of care<br>-Decide to implement ACP into action | <b>Enhanced awareness of EOL care during ACP</b> |
| -Talk with own family about my own EOL care<br>-Contemplate my own EOL care                                                                                                                              | <b>Confirm my own way of thinking about EOL</b>  |
| -Discuss EOL care between patients' and patients' families<br>-Be conscious not to act too 'medical' around patients<br>-Think about patients' intentions                                                | <b>Awareness of person-centred care</b>          |

---

|                                                                                                                           |                                                                                    |
|---------------------------------------------------------------------------------------------------------------------------|------------------------------------------------------------------------------------|
| -Create opportunities to talk to patients and their families<br>-Listen to patients' and their families' stories          | <b>Communicating with patients and their families</b>                              |
| -Cooperate within multidisciplinary teams<br>-Promote EOL care considering effective timing with multidisciplinary team   | <b>ACP implementation with multidiscipline professionals</b>                       |
| -Share program contents with colleagues<br>-Talk with community care professionals about ACP implementation               | <b>Promotion of ACP education</b>                                                  |
| -Create ACP implementation systems and a suitable hospital organizational climate<br>-Discuss EOL care with my colleagues | <b>Construction of a hospital organization that is easy for ACP implementation</b> |

---
